# Supplementary material for: Nano-delivery of miRNA inhibiting CENPF combined with cisplatin for bladder cancer treatment
Source: Royal Society of Chemistry journal article supplement (doi:10.1039/d5ra01513h), 2025-01-01
Supplement: d5ra01513h1.pdf [file d5ra01513h1.pdf]

## Electronic Supplementary Information

### Nano-delivery of miRNA inhibiting CENPF combined with cisplatin for bladder cancer treatment

Ruixiang Song<sup>a,b</sup>, Xin Chen<sup>c</sup>, Zhensheng Zhang<sup>b</sup>, Huiqing Wang<sup>b</sup>, Guanhua Chen<sup>b</sup>, Jinshan Xu<sup>b</sup>, Shuxiong Zeng<sup>b</sup>, Wentao Zhang<sup>a,d\*</sup>, Xudong Yao<sup>a,d\*</sup>

<sup>a</sup>Department of Urology, Shanghai Tenth People's Hospital, Tongji University, Shanghai, 200072, China

<sup>b</sup>Department of Urology, Changhai Hospital, Naval Medical University, Shanghai, 200433, China.

<sup>c</sup>Department of Urology, Zhejiang Qiushi Cardiovascular Hospital, Hangzhou, 310011, China

<sup>d</sup>Urologic Cancer Institute, School of Medicine, Tongji University, Shanghai, 200072, China.

\*Corresponding author:

[zhangwentao98@163.com](mailto:zhangwentao98@163.com) (W.T.Z.)

[yaoxudong1967@163.com](mailto:yaoxudong1967@163.com) (X.D.Y.)

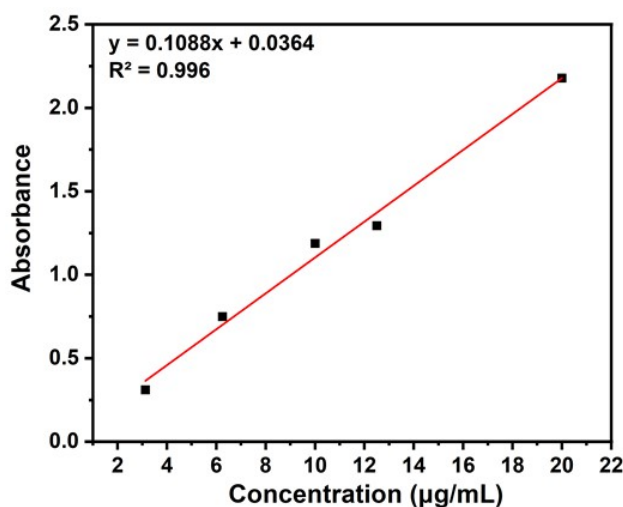

**Figure S1.** The standard curve of CDDP.

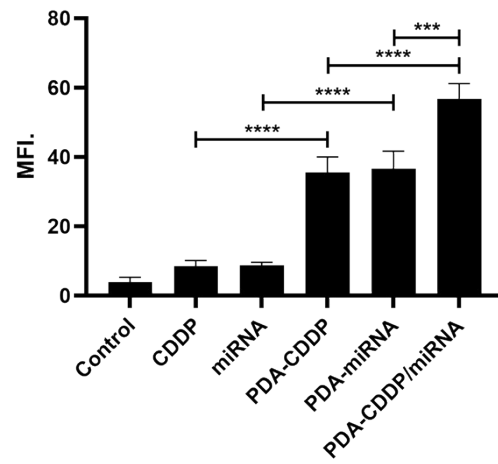

**Figure S2.** Statistical analysis of TUNEL fluorescence intensity in tumor tissues after different treatments.
